# Supplementary material
Source: PubMed Central journal article supplement (PMC4931964)
Supplement: NIHMS767812-supplement-Appendix.pdf [file NIHMS767812-supplement-Appendix.pdf]

Table 1: Power and type I error probability ( $\alpha$ ) for fixed effects analysis. The target significance level is 0.05. NM is no missingness, MI is multiple imputation using gamma meta-regression, ME is mean imputation, SGR is single imputation using gamma meta-regression, SLM is single imputation using linear regression based on the log-variance, and CC is complete case analysis.

|              | $\beta_1 = 0$ |          | $\beta_1 = 0.75$ |          | $\beta_1 = 1.5$ |          |
|--------------|---------------|----------|------------------|----------|-----------------|----------|
| 10% missing  | <i>Power</i>  | $\alpha$ | <i>Power</i>     | $\alpha$ | <i>Power</i>    | $\alpha$ |
| NM           | 0.98          | 0.05     | 0.54             | 0.05     | 0.25            | 0.05     |
| MI           | 0.98          | 0.05     | 0.54             | 0.05     | 0.25            | 0.05     |
| ME           | 0.98          | 0.05     | 0.53             | 0.06     | 0.24            | 0.05     |
| SGR          | 0.98          | 0.05     | 0.54             | 0.05     | 0.25            | 0.05     |
| SLM          | 0.98          | 0.05     | 0.54             | 0.05     | 0.25            | 0.05     |
| CC           | 0.97          | 0.05     | 0.50             | 0.05     | 0.23            | 0.05     |
| 25 % missing | <i>Power</i>  | $\alpha$ | <i>Power</i>     | $\alpha$ | <i>Power</i>    | $\alpha$ |
| NM           | 0.98          | 0.05     | 0.54             | 0.05     | 0.25            | 0.05     |
| MI           | 0.98          | 0.05     | 0.54             | 0.05     | 0.25            | 0.05     |
| ME           | 0.98          | 0.05     | 0.54             | 0.07     | 0.26            | 0.07     |
| SGR          | 0.98          | 0.05     | 0.54             | 0.05     | 0.25            | 0.05     |
| SLM          | 0.98          | 0.05     | 0.54             | 0.05     | 0.25            | 0.05     |
| CC           | 0.94          | 0.05     | 0.46             | 0.05     | 0.22            | 0.05     |
| 40 % missing | <i>Power</i>  | $\alpha$ | <i>Power</i>     | $\alpha$ | <i>Power</i>    | $\alpha$ |
| NM           | 0.98          | 0.05     | 0.54             | 0.05     | 0.26            | 0.06     |
| MI           | 0.98          | 0.05     | 0.54             | 0.05     | 0.25            | 0.05     |
| ME           | 0.98          | 0.05     | 0.56             | 0.08     | 0.28            | 0.10     |
| SGR          | 0.98          | 0.05     | 0.54             | 0.05     | 0.25            | 0.05     |
| SLM          | 0.98          | 0.05     | 0.54             | 0.05     | 0.25            | 0.05     |
| CC           | 0.88          | 0.05     | 0.41             | 0.05     | 0.22            | 0.05     |

Table 2: Confidence interval width, coverage probability, estimation bias, estimated standard error, estimated mean square error, and empirical standard error for fixed effects analysis, and 10% missingness in sample variances. NM is no missingness, MI is multiple imputation using gamma meta-regression, ME is mean imputation, SGR is single imputation using gamma meta-regression, SLM is single imputation using linear regression based on the log-variance, and CC is complete case analysis.

| $\beta_1 = 0$    | Width  | Coverage | Bias    | Estimated SE | Estimated MSE | Empirical SE |
|------------------|--------|----------|---------|--------------|---------------|--------------|
| NM               | 0.0961 | 0.946    | 0.0001  | 0.0245       | 0.0012        | 0.0249       |
| MI               | 0.0966 | 0.950    | 0.0001  | 0.0246       | 0.0012        | 0.0247       |
| ME               | 0.0962 | 0.947    | 0.0001  | 0.0245       | 0.0012        | 0.0249       |
| SGR              | 0.0966 | 0.950    | 0.0001  | 0.0246       | 0.0012        | 0.0247       |
| SLM              | 0.0966 | 0.950    | 0.0001  | 0.0246       | 0.0012        | 0.0247       |
| CC               | 0.1019 | 0.949    | 0.0000  | 0.0260       | 0.0014        | 0.0261       |
| $\beta_1 = 0.75$ | Width  | Coverage | Bias    | Estimated SE | Estimated MSE | Empirical SE |
| NM               | 0.1899 | 0.946    | 0.0001  | 0.0485       | 0.0047        | 0.0490       |
| MI               | 0.1908 | 0.949    | 0.0001  | 0.0487       | 0.0047        | 0.0487       |
| ME               | 0.1917 | 0.944    | 0.0001  | 0.0489       | 0.0049        | 0.0498       |
| SGR              | 0.1908 | 0.949    | 0.0001  | 0.0487       | 0.0047        | 0.0487       |
| SLM              | 0.1908 | 0.949    | 0.0001  | 0.0487       | 0.0047        | 0.0487       |
| CC               | 0.1994 | 0.950    | 0.0000  | 0.0509       | 0.0052        | 0.0509       |
| $\beta_1 = 1.5$  | Width  | Coverage | Bias    | Estimated SE | Estimated MSE | Empirical SE |
| NM               | 0.3027 | 0.950    | 0.0000  | 0.0772       | 0.0120        | 0.0779       |
| MI               | 0.3040 | 0.951    | -0.0001 | 0.0775       | 0.0120        | 0.0775       |
| ME               | 0.3113 | 0.946    | -0.0001 | 0.0794       | 0.0128        | 0.0808       |
| SGR              | 0.3039 | 0.951    | -0.0001 | 0.0775       | 0.0120        | 0.0775       |
| SLM              | 0.3039 | 0.951    | -0.0001 | 0.0775       | 0.0120        | 0.0775       |
| CC               | 0.3157 | 0.951    | -0.0003 | 0.0805       | 0.0130        | 0.0806       |

Table 3: Confidence interval width, coverage probability, estimation bias, estimated standard error, estimated mean square error, and empirical standard error for fixed effects analysis, and 25% missingness in sample variances. NM is no missingness, MI is multiple imputation using gamma meta-regression, ME is mean imputation, SGR is single imputation using gamma meta-regression, SLM is single imputation using linear regression based on the log-variance, and CC is complete case analysis.

| $\beta_1 = 0$    | Width  | Coverage | Bias    | Estimated SE | Estimated MSE | Empirical SE |
|------------------|--------|----------|---------|--------------|---------------|--------------|
| NM               | 0.096  | 0.948    | 0.0001  | 0.0245       | 0.0012        | 0.0247       |
| MI               | 0.097  | 0.951    | 0.0001  | 0.0246       | 0.0012        | 0.0246       |
| ME               | 0.096  | 0.948    | 0.0001  | 0.0246       | 0.0012        | 0.0247       |
| SGR              | 0.097  | 0.950    | 0.0001  | 0.0246       | 0.0012        | 0.0246       |
| SLM              | 0.097  | 0.951    | 0.0001  | 0.0246       | 0.0012        | 0.0246       |
| CC               | 0.112  | 0.950    | 0.0002  | 0.0285       | 0.0016        | 0.0284       |
| $\beta_1 = 0.75$ | Width  | Coverage | Bias    | Estimated SE | Estimated MSE | Empirical SE |
| NM               | 0.1899 | 0.949    | 0.0000  | 0.0485       | 0.0047        | 0.0489       |
| MI               | 0.1908 | 0.952    | 0.0000  | 0.0487       | 0.0047        | 0.0487       |
| ME               | 0.1892 | 0.935    | -0.0001 | 0.0483       | 0.0050        | 0.0513       |
| SGR              | 0.1908 | 0.952    | 0.0000  | 0.0487       | 0.0047        | 0.0487       |
| SLM              | 0.1908 | 0.952    | 0.0000  | 0.0487       | 0.0047        | 0.0487       |
| CC               | 0.2102 | 0.950    | 0.0002  | 0.0536       | 0.0057        | 0.0535       |
| $\beta_1 = 1.5$  | Width  | Coverage | Bias    | Estimated SE | Estimated MSE | Empirical SE |
| NM               | 0.3026 | 0.949    | -0.0004 | 0.0772       | 0.0121        | 0.0780       |
| MI               | 0.3040 | 0.951    | -0.0003 | 0.0775       | 0.0120        | 0.0777       |
| ME               | 0.3124 | 0.932    | -0.0006 | 0.0797       | 0.0137        | 0.0857       |
| SGR              | 0.3039 | 0.951    | -0.0003 | 0.0775       | 0.0120        | 0.0777       |
| SLM              | 0.3039 | 0.951    | -0.0003 | 0.0775       | 0.0120        | 0.0777       |
| CC               | 0.3245 | 0.951    | -0.0002 | 0.0828       | 0.0137        | 0.0829       |

Table 4: Confidence interval width, coverage probability, estimation bias, estimated standard error, estimated mean square error, and empirical standard error for fixed effects analysis, and 40% missingness in sample variances. NM is no missingness, MI is multiple imputation using gamma meta-regression, ME is mean imputation, SGR is single imputation using gamma meta-regression, SLM is single imputation using linear regression based on the log-variance, and CC is complete case analysis.

| $\beta_1 = 0$    | Width  | Coverage | Bias   | Estimated SE | Estimated MSE | Empirical SE |
|------------------|--------|----------|--------|--------------|---------------|--------------|
| NM               | 0.0961 | 0.950    | 0.0002 | 0.0245       | 0.0012        | 0.0247       |
| MI               | 0.0966 | 0.951    | 0.0002 | 0.0246       | 0.0012        | 0.0246       |
| ME               | 0.0963 | 0.950    | 0.0002 | 0.0246       | 0.0012        | 0.0247       |
| SGR              | 0.0966 | 0.951    | 0.0002 | 0.0246       | 0.0012        | 0.0246       |
| SLM              | 0.0966 | 0.951    | 0.0002 | 0.0246       | 0.0012        | 0.0246       |
| CC               | 0.1249 | 0.951    | 0.0001 | 0.0319       | 0.0020        | 0.0319       |
| $\beta_1 = 0.75$ | Width  | Coverage | Bias   | Estimated SE | Estimated MSE | Empirical SE |
| NM               | 0.1899 | 0.948    | 0.0003 | 0.0485       | 0.0048        | 0.0491       |
| MI               | 0.1908 | 0.950    | 0.0003 | 0.0487       | 0.0048        | 0.0490       |
| ME               | 0.1841 | 0.917    | 0.0004 | 0.0470       | 0.0050        | 0.0530       |
| SGR              | 0.1908 | 0.949    | 0.0003 | 0.0487       | 0.0048        | 0.0490       |
| SLM              | 0.1908 | 0.949    | 0.0003 | 0.0487       | 0.0048        | 0.0490       |
| CC               | 0.2241 | 0.950    | 0.0001 | 0.0572       | 0.0066        | 0.0576       |
| $\beta_1 = 1.5$  | Width  | Coverage | Bias   | Estimated SE | Estimated MSE | Empirical SE |
| NM               | 0.3026 | 0.944    | 0.0002 | 0.0772       | 0.0122        | 0.0788       |
| MI               | 0.3040 | 0.947    | 0.0001 | 0.0775       | 0.0122        | 0.0785       |
| ME               | 0.3089 | 0.899    | 0.0001 | 0.0788       | 0.0151        | 0.0942       |
| SGR              | 0.3039 | 0.946    | 0.0001 | 0.0775       | 0.0122        | 0.0785       |
| SLM              | 0.3039 | 0.947    | 0.0001 | 0.0775       | 0.0122        | 0.0785       |
| CC               | 0.3353 | 0.946    | 0.0000 | 0.0856       | 0.0149        | 0.0868       |

Table 5: Power and type I error ( $\alpha$ ) rates for mixed effects analysis, and 10% missingness in sample variances. NM is no missingness, MI is multiple imputation using gamma meta-regression, ME is mean imputation, SGR is single imputation using gamma meta-regression, SLM is single imputation using linear regression based on the log-variance, and CC is complete case analysis.

|                            | $\beta_1 = 0$ |          | $\beta_1 = 0.75$ |          | $\beta_1 = 1.5$ |          |
|----------------------------|---------------|----------|------------------|----------|-----------------|----------|
|                            | Power         | $\alpha$ | Power            | $\alpha$ | Power           | $\alpha$ |
| $\tau^2 = 1, \tau_b^2 = 1$ |               |          |                  |          |                 |          |
| NM                         | 0.78          | 0.06     | 0.72             | 0.06     | 0.56            | 0.07     |
| MI                         | 0.78          | 0.06     | 0.72             | 0.06     | 0.55            | 0.06     |
| ME                         | 0.78          | 0.06     | 0.72             | 0.06     | 0.55            | 0.07     |
| SGR                        | 0.78          | 0.06     | 0.72             | 0.06     | 0.56            | 0.07     |
| SLM                        | 0.78          | 0.06     | 0.72             | 0.06     | 0.56            | 0.07     |
| CC                         | 0.74          | 0.06     | 0.68             | 0.06     | 0.53            | 0.07     |
| $\tau^2 = 2, \tau_b^2 = 1$ |               |          |                  |          |                 |          |
| NM                         | 0.51          | 0.06     | 0.48             | 0.06     | 0.39            | 0.07     |
| MI                         | 0.51          | 0.06     | 0.48             | 0.06     | 0.38            | 0.06     |
| ME                         | 0.51          | 0.06     | 0.48             | 0.06     | 0.38            | 0.07     |
| SGR                        | 0.51          | 0.06     | 0.48             | 0.06     | 0.39            | 0.07     |
| SLM                        | 0.51          | 0.06     | 0.48             | 0.06     | 0.39            | 0.07     |
| CC                         | 0.47          | 0.06     | 0.44             | 0.06     | 0.36            | 0.07     |
| $\tau^2 = 1, \tau_b^2 = 2$ |               |          |                  |          |                 |          |
| NM                         | 0.78          | 0.07     | 0.71             | 0.07     | 0.56            | 0.07     |
| MI                         | 0.78          | 0.07     | 0.70             | 0.07     | 0.52            | 0.06     |
| ME                         | 0.78          | 0.07     | 0.70             | 0.07     | 0.54            | 0.07     |
| SGR                        | 0.78          | 0.07     | 0.70             | 0.07     | 0.55            | 0.07     |
| SLM                        | 0.78          | 0.07     | 0.70             | 0.07     | 0.55            | 0.07     |
| CC                         | 0.73          | 0.07     | 0.67             | 0.07     | 0.53            | 0.07     |
| $\tau^2 = 2, \tau_b^2 = 2$ |               |          |                  |          |                 |          |
| NM                         | 0.51          | 0.07     | 0.47             | 0.07     | 0.39            | 0.07     |
| MI                         | 0.51          | 0.07     | 0.47             | 0.07     | 0.36            | 0.07     |
| ME                         | 0.51          | 0.07     | 0.47             | 0.07     | 0.38            | 0.08     |
| SGR                        | 0.51          | 0.07     | 0.47             | 0.07     | 0.38            | 0.07     |
| SLM                        | 0.51          | 0.07     | 0.47             | 0.07     | 0.39            | 0.08     |
| CC                         | 0.48          | 0.07     | 0.44             | 0.07     | 0.36            | 0.08     |

Table 6: Power and type I error ( $\alpha$ ) rates for mixed effects analysis, and 25% missingness in sample variances. NM is no missingness, MI is multiple imputation using gamma meta-regression, ME is mean imputation, SGR is single imputation using gamma meta-regression, SLM is single imputation using linear regression based on the log-variance, and CC is complete case analysis.

|                            | $\beta_1 = 0$ |          | $\beta_1 = 0.75$ |          | $\beta_1 = 1.5$ |          |
|----------------------------|---------------|----------|------------------|----------|-----------------|----------|
|                            | Power         | $\alpha$ | Power            | $\alpha$ | Power           | $\alpha$ |
| $\tau^2 = 1, \tau_b^2 = 1$ |               |          |                  |          |                 |          |
| NM                         | 0.78          | 0.06     | 0.72             | 0.06     | 0.57            | 0.06     |
| MI                         | 0.78          | 0.06     | 0.71             | 0.06     | 0.52            | 0.05     |
| ME                         | 0.78          | 0.06     | 0.72             | 0.06     | 0.53            | 0.08     |
| SGR                        | 0.78          | 0.06     | 0.71             | 0.06     | 0.55            | 0.06     |
| SLM                        | 0.78          | 0.06     | 0.72             | 0.06     | 0.56            | 0.07     |
| CC                         | 0.67          | 0.07     | 0.62             | 0.07     | 0.48            | 0.06     |
| $\tau^2 = 2, \tau_b^2 = 1$ |               |          |                  |          |                 |          |
| NM                         | 0.51          | 0.06     | 0.48             | 0.06     | 0.40            | 0.06     |
| MI                         | 0.51          | 0.06     | 0.47             | 0.06     | 0.37            | 0.06     |
| ME                         | 0.52          | 0.06     | 0.48             | 0.06     | 0.38            | 0.08     |
| SGR                        | 0.52          | 0.06     | 0.48             | 0.06     | 0.38            | 0.07     |
| SLM                        | 0.52          | 0.06     | 0.48             | 0.06     | 0.39            | 0.07     |
| CC                         | 0.41          | 0.07     | 0.38             | 0.07     | 0.33            | 0.07     |
| $\tau^2 = 1, \tau_b^2 = 2$ |               |          |                  |          |                 |          |
| NM                         | 0.77          | 0.07     | 0.71             | 0.07     | 0.57            | 0.07     |
| MI                         | 0.77          | 0.06     | 0.67             | 0.06     | 0.46            | 0.05     |
| ME                         | 0.77          | 0.07     | 0.70             | 0.07     | 0.51            | 0.09     |
| SGR                        | 0.77          | 0.07     | 0.69             | 0.07     | 0.53            | 0.07     |
| SLM                        | 0.77          | 0.07     | 0.70             | 0.07     | 0.54            | 0.08     |
| CC                         | 0.66          | 0.07     | 0.60             | 0.07     | 0.48            | 0.07     |
| $\tau^2 = 2, \tau_b^2 = 2$ |               |          |                  |          |                 |          |
| NM                         | 0.51          | 0.07     | 0.47             | 0.07     | 0.39            | 0.07     |
| MI                         | 0.51          | 0.06     | 0.45             | 0.06     | 0.33            | 0.06     |
| ME                         | 0.51          | 0.07     | 0.47             | 0.07     | 0.37            | 0.09     |
| SGR                        | 0.51          | 0.07     | 0.47             | 0.07     | 0.37            | 0.08     |
| SLM                        | 0.51          | 0.07     | 0.47             | 0.07     | 0.38            | 0.08     |
| CC                         | 0.41          | 0.07     | 0.39             | 0.07     | 0.33            | 0.07     |

Table 7: Power and type I error probability ( $\alpha$ ) for mixed effects analysis, and 40% missingness in sample variances. The target significance level is 0.05. NM is no missingness, MI is multiple imputation using gamma meta-regression, ME is mean imputation, SGR is single imputation using gamma meta-regression, SLM is single imputation using linear regression based on the log-variance, and CC is complete case analysis.

|                            | $\beta_1 = 0$ |          | $\beta_1 = 0.75$ |          | $\beta_1 = 1.5$ |          |
|----------------------------|---------------|----------|------------------|----------|-----------------|----------|
|                            | <i>Power</i>  | $\alpha$ | <i>Power</i>     | $\alpha$ | <i>Power</i>    | $\alpha$ |
| $\tau^2 = 1, \tau_b^2 = 1$ |               |          |                  |          |                 |          |
| NM                         | 0.78          | 0.06     | 0.72             | 0.07     | 0.56            | 0.07     |
| MI                         | 0.78          | 0.06     | 0.70             | 0.06     | 0.49            | 0.05     |
| ME                         | 0.78          | 0.06     | 0.72             | 0.07     | 0.50            | 0.10     |
| SGR                        | 0.78          | 0.06     | 0.71             | 0.06     | 0.54            | 0.07     |
| SLM                        | 0.79          | 0.06     | 0.72             | 0.07     | 0.55            | 0.07     |
| CC                         | 0.58          | 0.07     | 0.53             | 0.07     | 0.44            | 0.08     |
| $\tau^2 = 2, \tau_b^2 = 1$ |               |          |                  |          |                 |          |
| NM                         | 0.51          | 0.06     | 0.48             | 0.06     | 0.39            | 0.07     |
| MI                         | 0.51          | 0.06     | 0.46             | 0.06     | 0.34            | 0.06     |
| ME                         | 0.51          | 0.06     | 0.48             | 0.07     | 0.38            | 0.10     |
| SGR                        | 0.51          | 0.06     | 0.47             | 0.07     | 0.37            | 0.07     |
| SLM                        | 0.51          | 0.06     | 0.48             | 0.07     | 0.38            | 0.07     |
| CC                         | 0.35          | 0.07     | 0.34             | 0.07     | 0.30            | 0.08     |
| $\tau^2 = 1, \tau_b^2 = 2$ |               |          |                  |          |                 |          |
| NM                         | 0.78          | 0.06     | 0.72             | 0.06     | 0.57            | 0.07     |
| MI                         | 0.77          | 0.06     | 0.66             | 0.05     | 0.42            | 0.05     |
| ME                         | 0.78          | 0.07     | 0.70             | 0.08     | 0.50            | 0.11     |
| SGR                        | 0.78          | 0.07     | 0.68             | 0.07     | 0.52            | 0.08     |
| SLM                        | 0.78          | 0.06     | 0.70             | 0.07     | 0.53            | 0.09     |
| CC                         | 0.58          | 0.07     | 0.53             | 0.08     | 0.44            | 0.08     |
| $\tau^2 = 2, \tau_b^2 = 2$ |               |          |                  |          |                 |          |
| NM                         | 0.52          | 0.06     | 0.49             | 0.06     | 0.40            | 0.07     |
| MI                         | 0.51          | 0.06     | 0.45             | 0.06     | 0.31            | 0.05     |
| ME                         | 0.52          | 0.07     | 0.48             | 0.07     | 0.38            | 0.11     |
| SGR                        | 0.52          | 0.07     | 0.47             | 0.07     | 0.37            | 0.08     |
| SLM                        | 0.52          | 0.07     | 0.48             | 0.07     | 0.39            | 0.09     |
| CC                         | 0.36          | 0.08     | 0.34             | 0.08     | 0.30            | 0.08     |

Figure 1: Power and type I error probability ( $\alpha$ ) for mixed effects analysis, and 40% missingness in sample variances when  $\tau^2 = 2, \tau_b^2 = 1$  and  $\tau^2 = 1, \tau_b^2 = 2$ . The target significance level is 0.05. NM is no missingness, MI is multiple imputation using gamma meta-regression, ME is mean imputation, SGR is single imputation using gamma meta-regression, SLM is single imputation using linear regression based on the log-variance, and CC is complete case analysis.

$$\tau^2 = 2, \tau_b^2 = 1$$

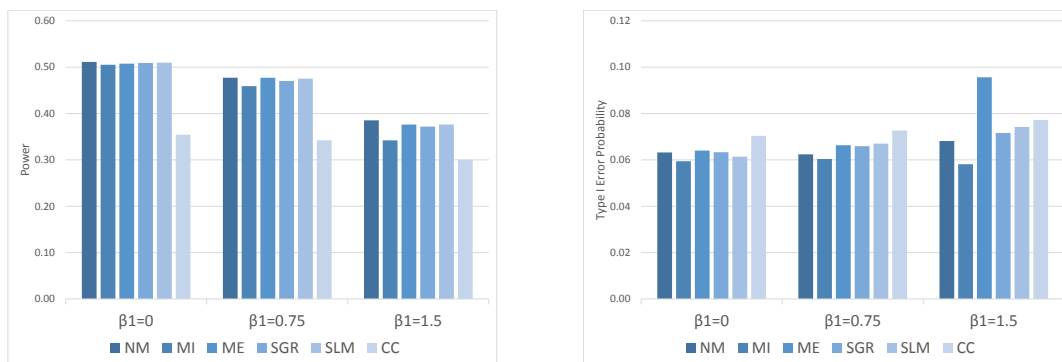

$$\tau^2 = 1, \tau_b^2 = 2$$

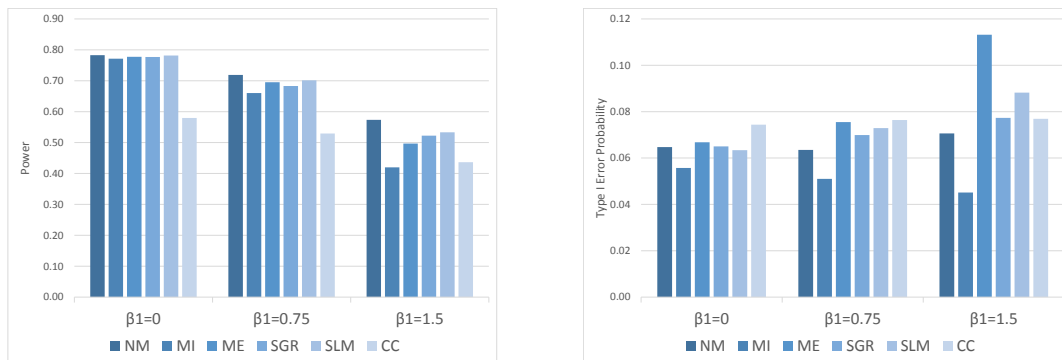



Table 8: Confidence interval width, coverage probability, estimation bias, estimated standard error, estimated mean square error, and empirical standard error for mixed effects analysis, and 10% missingness in sample variances for  $\beta_1 = 0$ . NM is no missingness, MI is multiple imputation using gamma meta-regression, ME is mean imputation, SGR is single imputation using gamma meta-regression, SLM is single imputation using linear regression based on the log-variance, and CC is complete case analysis.

| $\beta_1 = 0$              | Width  | Coverage | Bias    | Estimated SE | Estimated MSE | Empirical SE |
|----------------------------|--------|----------|---------|--------------|---------------|--------------|
| $\tau^2 = 1, \tau_b^2 = 1$ |        |          |         |              |               |              |
| NM                         | 0.5628 | 0.942    | -0.0011 | 0.1436       | 0.0417        | 0.1435       |
| MI                         | 0.5638 | 0.942    | -0.0011 | 0.1438       | 0.0417        | 0.1435       |
| ME                         | 0.5626 | 0.942    | -0.0010 | 0.1435       | 0.0416        | 0.1435       |
| SGR                        | 0.5626 | 0.942    | -0.0011 | 0.1435       | 0.0417        | 0.1435       |
| SLM                        | 0.5626 | 0.942    | -0.0011 | 0.1435       | 0.0416        | 0.1435       |
| CC                         | 0.5931 | 0.938    | -0.0015 | 0.1513       | 0.0465        | 0.1519       |
| $\tau^2 = 2, \tau_b^2 = 1$ |        |          |         |              |               |              |
| NM                         | 0.7866 | 0.941    | -0.0016 | 0.2007       | 0.0814        | 0.2007       |
| MI                         | 0.7874 | 0.941    | -0.0015 | 0.2009       | 0.0815        | 0.2007       |
| ME                         | 0.7862 | 0.941    | -0.0015 | 0.2006       | 0.0814        | 0.2007       |
| SGR                        | 0.7863 | 0.942    | -0.0015 | 0.2006       | 0.0814        | 0.2007       |
| SLM                        | 0.7864 | 0.941    | -0.0015 | 0.2006       | 0.0814        | 0.2007       |
| CC                         | 0.8291 | 0.938    | -0.0022 | 0.2115       | 0.0910        | 0.2124       |
| $\tau^2 = 1, \tau_b^2 = 2$ |        |          |         |              |               |              |
| NM                         | 0.5632 | 0.930    | -0.0001 | 0.1437       | 0.0427        | 0.1464       |
| MI                         | 0.5664 | 0.933    | -0.0001 | 0.1445       | 0.0430        | 0.1465       |
| ME                         | 0.5633 | 0.931    | -0.0001 | 0.1437       | 0.0430        | 0.1465       |
| SGR                        | 0.5634 | 0.932    | -0.0001 | 0.1437       | 0.0428        | 0.1465       |
| SLM                        | 0.5630 | 0.931    | -0.0001 | 0.1436       | 0.0428        | 0.1465       |
| CC                         | 0.5936 | 0.932    | -0.0001 | 0.1514       | 0.0477        | 0.1547       |
| $\tau^2 = 2, \tau_b^2 = 2$ |        |          |         |              |               |              |
| NM                         | 0.7844 | 0.929    | 0.0001  | 0.2001       | 0.0831        | 0.2041       |
| MI                         | 0.7872 | 0.932    | 0.0001  | 0.2008       | 0.0833        | 0.2042       |
| ME                         | 0.7840 | 0.930    | 0.0001  | 0.2000       | 0.0831        | 0.2042       |
| SGR                        | 0.7842 | 0.929    | 0.0001  | 0.2000       | 0.0831        | 0.2042       |
| SLM                        | 0.7842 | 0.930    | 0.0001  | 0.2000       | 0.0830        | 0.2042       |
| CC                         | 0.8266 | 0.931    | 0.0001  | 0.2109       | 0.0926        | 0.2156       |

Table 9: Confidence interval width, coverage probability, estimation bias, estimated standard error, estimated mean square error, and empirical standard error for mixed effects analysis, and 10% missingness in sample variances for  $\beta_1 = 0.75$ . NM is no missingness, MI is multiple imputation using gamma meta-regression, ME is mean imputation, SGR is single imputation using gamma meta-regression, SLM is single imputation using linear regression based on the log-variance, and CC is complete case analysis.

| $\beta_1 = 0.75$           | Width  | Coverage | Bias    | Estimated SE | Estimated MSE | Empirical SE |
|----------------------------|--------|----------|---------|--------------|---------------|--------------|
| $\tau^2 = 1, \tau_b^2 = 1$ |        |          |         |              |               |              |
| NM                         | 0.6082 | 0.940    | -0.0011 | 0.1552       | 0.0489        | 0.1557       |
| MI                         | 0.6129 | 0.942    | -0.0010 | 0.1563       | 0.0493        | 0.1561       |
| ME                         | 0.6094 | 0.940    | -0.0010 | 0.1555       | 0.0492        | 0.1564       |
| SGR                        | 0.6094 | 0.940    | -0.0010 | 0.1555       | 0.0491        | 0.1561       |
| SLM                        | 0.6082 | 0.941    | -0.0010 | 0.1552       | 0.0490        | 0.1561       |
| CC                         | 0.6396 | 0.937    | -0.0012 | 0.1632       | 0.0543        | 0.1642       |
| $\tau^2 = 2, \tau_b^2 = 1$ |        |          |         |              |               |              |
| NM                         | 0.8236 | 0.940    | -0.0016 | 0.2101       | 0.0897        | 0.2108       |
| MI                         | 0.8269 | 0.943    | -0.0014 | 0.2110       | 0.0901        | 0.2110       |
| ME                         | 0.8236 | 0.940    | -0.0014 | 0.2101       | 0.0898        | 0.2111       |
| SGR                        | 0.8241 | 0.940    | -0.0014 | 0.2102       | 0.0898        | 0.2110       |
| SLM                        | 0.8230 | 0.941    | -0.0015 | 0.2100       | 0.0897        | 0.2110       |
| CC                         | 0.8667 | 0.937    | -0.0018 | 0.2211       | 0.0998        | 0.2225       |
| $\tau^2 = 1, \tau_b^2 = 2$ |        |          |         |              |               |              |
| NM                         | 0.6138 | 0.932    | -0.0003 | 0.1566       | 0.0508        | 0.1598       |
| MI                         | 0.6258 | 0.935    | -0.0005 | 0.1597       | 0.0522        | 0.1612       |
| ME                         | 0.6178 | 0.931    | -0.0003 | 0.1576       | 0.0517        | 0.1614       |
| SGR                        | 0.6179 | 0.930    | -0.0004 | 0.1576       | 0.0516        | 0.1612       |
| SLM                        | 0.6147 | 0.929    | -0.0005 | 0.1568       | 0.0514        | 0.1615       |
| CC                         | 0.6458 | 0.930    | -0.0003 | 0.1648       | 0.0566        | 0.1688       |
| $\tau^2 = 2, \tau_b^2 = 2$ |        |          |         |              |               |              |
| NM                         | 0.8292 | 0.929    | -0.0001 | 0.2115       | 0.0930        | 0.2161       |
| MI                         | 0.8386 | 0.932    | -0.0002 | 0.2139       | 0.0943        | 0.2170       |
| ME                         | 0.8314 | 0.929    | -0.0001 | 0.2121       | 0.0937        | 0.2171       |
| SGR                        | 0.8321 | 0.930    | -0.0002 | 0.2123       | 0.0938        | 0.2172       |
| SLM                        | 0.8291 | 0.929    | -0.0002 | 0.2115       | 0.0934        | 0.2172       |
| CC                         | 0.8730 | 0.929    | 0.0000  | 0.2227       | 0.1036        | 0.2283       |

Table 10: Confidence interval width, coverage probability, estimation bias, estimated standard error, estimated mean square error, and empirical standard error for mixed effects analysis, and 10% missingness in sample variances for  $\beta_1 = 1.5$ . NM is no missingness, MI is multiple imputation using gamma meta-regression, ME is mean imputation, SGR is single imputation using gamma meta-regression, SLM is single imputation using linear regression based on the log-variance, and CC is complete case analysis.

| $\beta_1 = 1.5$            | Width  | Coverage | Bias    | Estimated SE | Estimated MSE | Empirical SE |
|----------------------------|--------|----------|---------|--------------|---------------|--------------|
| $\tau^2 = 1, \tau_b^2 = 1$ |        |          |         |              |               |              |
| NM                         | 0.7358 | 0.935    | -0.0005 | 0.1877       | 0.0727        | 0.1909       |
| MI                         | 0.7539 | 0.937    | -0.0006 | 0.1923       | 0.0752        | 0.1929       |
| ME                         | 0.7549 | 0.930    | -0.0007 | 0.1926       | 0.0781        | 0.1998       |
| SGR                        | 0.7414 | 0.932    | -0.0006 | 0.1891       | 0.0738        | 0.1923       |
| SLM                        | 0.7398 | 0.932    | -0.0007 | 0.1887       | 0.0737        | 0.1926       |
| CC                         | 0.7702 | 0.931    | -0.0007 | 0.1965       | 0.0798        | 0.1999       |
| $\tau^2 = 2, \tau_b^2 = 1$ |        |          |         |              |               |              |
| NM                         | 0.9482 | 0.934    | -0.0011 | 0.2419       | 0.1207        | 0.2457       |
| MI                         | 0.9624 | 0.936    | -0.0012 | 0.2455       | 0.1233        | 0.2473       |
| ME                         | 0.9640 | 0.930    | -0.0013 | 0.2459       | 0.1269        | 0.2541       |
| SGR                        | 0.9531 | 0.933    | -0.0011 | 0.2431       | 0.1220        | 0.2469       |
| SLM                        | 0.9502 | 0.933    | -0.0012 | 0.2424       | 0.1217        | 0.2472       |
| CC                         | 0.9937 | 0.929    | -0.0013 | 0.2535       | 0.1330        | 0.2578       |
| $\tau^2 = 1, \tau_b^2 = 2$ |        |          |         |              |               |              |
| NM                         | 0.7360 | 0.929    | -0.0008 | 0.1878       | 0.0739        | 0.1935       |
| MI                         | 0.7823 | 0.939    | -0.0011 | 0.1996       | 0.0814        | 0.2003       |
| ME                         | 0.7599 | 0.925    | -0.0006 | 0.1939       | 0.0804        | 0.2037       |
| SGR                        | 0.7479 | 0.927    | -0.0007 | 0.1908       | 0.0766        | 0.1974       |
| SLM                        | 0.7452 | 0.925    | -0.0009 | 0.1901       | 0.0772        | 0.1997       |
| CC                         | 0.7711 | 0.926    | -0.0006 | 0.1967       | 0.0815        | 0.2033       |
| $\tau^2 = 2, \tau_b^2 = 2$ |        |          |         |              |               |              |
| NM                         | 0.9536 | 0.928    | -0.0006 | 0.2433       | 0.1245        | 0.2511       |
| MI                         | 0.9903 | 0.933    | -0.0009 | 0.2526       | 0.1321        | 0.2567       |
| ME                         | 0.9758 | 0.924    | -0.0003 | 0.2489       | 0.1326        | 0.2612       |
| SGR                        | 0.9650 | 0.926    | -0.0005 | 0.2462       | 0.1279        | 0.2548       |
| SLM                        | 0.9593 | 0.924    | -0.0007 | 0.2446       | 0.1280        | 0.2567       |
| CC                         | 1.0003 | 0.923    | -0.0003 | 0.2552       | 0.1376        | 0.2640       |

Table 11: Confidence interval width, coverage probability, estimation bias, estimated standard error, estimated mean square error, and empirical standard error for mixed effects analysis, and 25% missingness in sample variances for  $\beta_1 = 0$ . NM is no missingness, MI is multiple imputation using gamma meta-regression, ME is mean imputation, SGR is single imputation using gamma meta-regression, SLM is single imputation using linear regression based on the log-variance, and CC is complete case analysis.

| $\beta_1 = 0$              | Width  | Coverage | Bias    | Estimated SE | Estimated MSE | Empirical SE |
|----------------------------|--------|----------|---------|--------------|---------------|--------------|
| $\tau^2 = 1, \tau_b^2 = 1$ |        |          |         |              |               |              |
| NM                         | 0.5627 | 0.940    | 0.0004  | 0.1436       | 0.0420        | 0.1447       |
| MI                         | 0.5659 | 0.943    | 0.0004  | 0.1444       | 0.0422        | 0.1448       |
| ME                         | 0.5631 | 0.939    | 0.0004  | 0.1437       | 0.0421        | 0.1448       |
| SGR                        | 0.5632 | 0.940    | 0.0004  | 0.1437       | 0.0421        | 0.1448       |
| SLM                        | 0.5631 | 0.941    | 0.0005  | 0.1436       | 0.0420        | 0.1448       |
| CC                         | 0.6499 | 0.935    | -0.0004 | 0.1658       | 0.0564        | 0.1676       |
| $\tau^2 = 2, \tau_b^2 = 1$ |        |          |         |              |               |              |
| NM                         | 0.7867 | 0.940    | 0.0005  | 0.2007       | 0.0821        | 0.2023       |
| MI                         | 0.7894 | 0.941    | 0.0005  | 0.2014       | 0.0823        | 0.2023       |
| ME                         | 0.7869 | 0.938    | 0.0005  | 0.2007       | 0.0821        | 0.2023       |
| SGR                        | 0.7870 | 0.940    | 0.0005  | 0.2008       | 0.0821        | 0.2023       |
| SLM                        | 0.7872 | 0.941    | 0.0005  | 0.2008       | 0.0821        | 0.2023       |
| CC                         | 0.9085 | 0.935    | -0.0008 | 0.2318       | 0.1102        | 0.2343       |
| $\tau^2 = 1, \tau_b^2 = 2$ |        |          |         |              |               |              |
| NM                         | 0.5644 | 0.932    | -0.0009 | 0.1440       | 0.0426        | 0.1457       |
| MI                         | 0.5717 | 0.938    | -0.0009 | 0.1459       | 0.0432        | 0.1460       |
| ME                         | 0.5650 | 0.932    | -0.0010 | 0.1441       | 0.0429        | 0.1460       |
| SGR                        | 0.5655 | 0.932    | -0.0009 | 0.1443       | 0.0429        | 0.1461       |
| SLM                        | 0.5642 | 0.932    | -0.0009 | 0.1439       | 0.0427        | 0.1461       |
| CC                         | 0.6506 | 0.927    | -0.0019 | 0.1660       | 0.0571        | 0.1683       |
| $\tau^2 = 2, \tau_b^2 = 2$ |        |          |         |              |               |              |
| NM                         | 0.7861 | 0.932    | -0.0015 | 0.2005       | 0.0828        | 0.2030       |
| MI                         | 0.7924 | 0.936    | -0.0015 | 0.2021       | 0.0833        | 0.2032       |
| ME                         | 0.7857 | 0.931    | -0.0015 | 0.2004       | 0.0830        | 0.2032       |
| SGR                        | 0.7862 | 0.931    | -0.0015 | 0.2006       | 0.0830        | 0.2032       |
| SLM                        | 0.7858 | 0.932    | -0.0015 | 0.2005       | 0.0828        | 0.2032       |
| CC                         | 0.9061 | 0.928    | -0.0029 | 0.2312       | 0.1108        | 0.2344       |

Table 12: Confidence interval width, coverage probability, estimation bias, estimated standard error, estimated mean square error, and empirical standard error for mixed effects analysis, and 25% missingness in sample variances for  $\beta_1 = 0.75$ . NM is no missingness, MI is multiple imputation using gamma meta-regression, ME is mean imputation, SGR is single imputation using gamma meta-regression, SLM is single imputation using linear regression based on the log-variance, and CC is complete case analysis.

| $\beta_1 = 0.75$           | Width  | Coverage | Bias    | Estimated SE | Estimated MSE | Empirical SE |
|----------------------------|--------|----------|---------|--------------|---------------|--------------|
| $\tau^2 = 1, \tau_b^2 = 1$ |        |          |         |              |               |              |
| NM                         | 0.6079 | 0.939    | 0.0009  | 0.1551       | 0.0491        | 0.1567       |
| MI                         | 0.6212 | 0.944    | 0.0006  | 0.1585       | 0.0506        | 0.1582       |
| ME                         | 0.6108 | 0.937    | 0.0006  | 0.1558       | 0.0502        | 0.1591       |
| SGR                        | 0.6129 | 0.941    | 0.0006  | 0.1564       | 0.0501        | 0.1583       |
| SLM                        | 0.6093 | 0.938    | 0.0006  | 0.1554       | 0.0498        | 0.1584       |
| CC                         | 0.6953 | 0.935    | -0.0003 | 0.1774       | 0.0646        | 0.1795       |
| $\tau^2 = 2, \tau_b^2 = 1$ |        |          |         |              |               |              |
| NM                         | 0.8234 | 0.939    | 0.0009  | 0.2101       | 0.0903        | 0.2122       |
| MI                         | 0.8334 | 0.942    | 0.0007  | 0.2126       | 0.0916        | 0.2131       |
| ME                         | 0.8239 | 0.937    | 0.0007  | 0.2102       | 0.0910        | 0.2137       |
| SGR                        | 0.8268 | 0.938    | 0.0007  | 0.2109       | 0.0911        | 0.2132       |
| SLM                        | 0.8233 | 0.938    | 0.0007  | 0.2100       | 0.0907        | 0.2133       |
| CC                         | 0.9449 | 0.933    | -0.0006 | 0.2411       | 0.1196        | 0.2441       |
| $\tau^2 = 1, \tau_b^2 = 2$ |        |          |         |              |               |              |
| NM                         | 0.6132 | 0.931    | -0.0004 | 0.1564       | 0.0504        | 0.1584       |
| MI                         | 0.6430 | 0.942    | -0.0004 | 0.1640       | 0.0542        | 0.1631       |
| ME                         | 0.6212 | 0.926    | -0.0004 | 0.1585       | 0.0529        | 0.1641       |
| SGR                        | 0.6248 | 0.929    | -0.0004 | 0.1594       | 0.0528        | 0.1628       |
| SLM                        | 0.6160 | 0.927    | -0.0003 | 0.1571       | 0.0523        | 0.1637       |
| CC                         | 0.7002 | 0.932    | -0.0017 | 0.1786       | 0.0662        | 0.1816       |
| $\tau^2 = 2, \tau_b^2 = 2$ |        |          |         |              |               |              |
| NM                         | 0.8287 | 0.929    | -0.0010 | 0.2114       | 0.0923        | 0.2144       |
| MI                         | 0.8517 | 0.936    | -0.0009 | 0.2173       | 0.0960        | 0.2177       |
| ME                         | 0.8319 | 0.927    | -0.0009 | 0.2122       | 0.0944        | 0.2182       |
| SGR                        | 0.8372 | 0.927    | -0.0009 | 0.2136       | 0.0948        | 0.2179       |
| SLM                        | 0.8281 | 0.926    | -0.0009 | 0.2113       | 0.0938        | 0.2181       |
| CC                         | 0.9487 | 0.928    | -0.0026 | 0.2420       | 0.1219        | 0.2463       |

Table 13: Confidence interval width, coverage probability, estimation bias, estimated standard error, estimated mean square error, and empirical standard error for mixed effects analysis, and 25% missingness in sample variances for  $\beta_1 = 1.5$ . NM is no missingness, MI is multiple imputation using gamma meta-regression, ME is mean imputation, SGR is single imputation using gamma meta-regression, SLM is single imputation using linear regression based on the log-variance, and CC is complete case analysis.

| $\beta_1 = 1.5$            | Width  | Coverage | Bias    | Estimated SE | Estimated MSE | Empirical SE |
|----------------------------|--------|----------|---------|--------------|---------------|--------------|
| $\tau^2 = 1, \tau_b^2 = 1$ |        |          |         |              |               |              |
| NM                         | 0.7351 | 0.937    | 0.0019  | 0.1875       | 0.0727        | 0.1912       |
| MI                         | 0.7846 | 0.948    | 0.0009  | 0.2001       | 0.0806        | 0.1989       |
| ME                         | 0.7844 | 0.923    | 0.0009  | 0.2001       | 0.0904        | 0.2218       |
| SGR                        | 0.7511 | 0.937    | 0.0009  | 0.1916       | 0.0763        | 0.1965       |
| SLM                        | 0.7474 | 0.934    | 0.0009  | 0.1907       | 0.0765        | 0.1978       |
| CC                         | 0.8198 | 0.936    | 0.0003  | 0.2091       | 0.0908        | 0.2133       |
| $\tau^2 = 2, \tau_b^2 = 1$ |        |          |         |              |               |              |
| NM                         | 0.9476 | 0.936    | 0.0020  | 0.2417       | 0.1209        | 0.2462       |
| MI                         | 0.9873 | 0.942    | 0.0010  | 0.2519       | 0.1291        | 0.2529       |
| ME                         | 0.9823 | 0.921    | 0.0010  | 0.2506       | 0.1397        | 0.2737       |
| SGR                        | 0.9627 | 0.935    | 0.0010  | 0.2456       | 0.1254        | 0.2513       |
| SLM                        | 0.9550 | 0.932    | 0.0010  | 0.2436       | 0.1248        | 0.2523       |
| CC                         | 1.0641 | 0.934    | -0.0001 | 0.2715       | 0.1531        | 0.2766       |
| $\tau^2 = 1, \tau_b^2 = 2$ |        |          |         |              |               |              |
| NM                         | 0.7335 | 0.928    | 0.0004  | 0.1871       | 0.0727        | 0.1907       |
| MI                         | 0.8491 | 0.949    | 0.0002  | 0.2166       | 0.0938        | 0.2119       |
| ME                         | 0.7919 | 0.911    | 0.0007  | 0.2020       | 0.0963        | 0.2322       |
| SGR                        | 0.7638 | 0.927    | -0.0003 | 0.1948       | 0.0799        | 0.2014       |
| SLM                        | 0.7572 | 0.917    | 0.0002  | 0.1932       | 0.0821        | 0.2086       |
| CC                         | 0.8190 | 0.928    | -0.0016 | 0.2089       | 0.0913        | 0.2137       |
| $\tau^2 = 2, \tau_b^2 = 2$ |        |          |         |              |               |              |
| NM                         | 0.9505 | 0.926    | -0.0001 | 0.2425       | 0.1224        | 0.2474       |
| MI                         | 1.0438 | 0.939    | -0.0004 | 0.2663       | 0.1443        | 0.2661       |
| ME                         | 0.9976 | 0.909    | 0.0002  | 0.2545       | 0.1499        | 0.2873       |
| SGR                        | 0.9803 | 0.924    | -0.0008 | 0.2501       | 0.1319        | 0.2583       |
| SLM                        | 0.9649 | 0.917    | -0.0004 | 0.2462       | 0.1328        | 0.2644       |
| CC                         | 1.0672 | 0.928    | -0.0027 | 0.2722       | 0.1555        | 0.2787       |

Table 14: Confidence interval width, coverage probability, estimation bias, estimated standard error, estimated mean square error, and empirical standard error for mixed effects analysis, and 40% missingness in sample variances for  $\beta_1 = 0$ . NM is no missingness, MI is multiple imputation using gamma meta-regression, ME is mean imputation, SGR is single imputation using gamma meta-regression, SLM is single imputation using linear regression based on the log-variance, and CC is complete case analysis.

| $\beta_1 = 0$              | Width  | Coverage | Bias    | Estimated SE | Estimated MSE | Empirical SE |
|----------------------------|--------|----------|---------|--------------|---------------|--------------|
| $\tau^2 = 1, \tau_b^2 = 1$ |        |          |         |              |               |              |
| NM                         | 0.5614 | 0.939    | -0.0024 | 0.1432       | 0.0418        | 0.1443       |
| MI                         | 0.5667 | 0.942    | -0.0024 | 0.1446       | 0.0421        | 0.1445       |
| ME                         | 0.5616 | 0.937    | -0.0023 | 0.1433       | 0.0419        | 0.1445       |
| SGR                        | 0.5620 | 0.936    | -0.0023 | 0.1434       | 0.0419        | 0.1445       |
| SLM                        | 0.5619 | 0.938    | -0.0024 | 0.1434       | 0.0418        | 0.1445       |
| CC                         | 0.7234 | 0.930    | -0.0009 | 0.1846       | 0.0710        | 0.1888       |
| $\tau^2 = 2, \tau_b^2 = 1$ |        |          |         |              |               |              |
| NM                         | 0.7847 | 0.937    | -0.0034 | 0.2002       | 0.0817        | 0.2019       |
| MI                         | 0.7894 | 0.941    | -0.0034 | 0.2014       | 0.0821        | 0.2020       |
| ME                         | 0.7846 | 0.936    | -0.0034 | 0.2002       | 0.0818        | 0.2020       |
| SGR                        | 0.7849 | 0.937    | -0.0034 | 0.2002       | 0.0818        | 0.2020       |
| SLM                        | 0.7854 | 0.939    | -0.0034 | 0.2004       | 0.0818        | 0.2020       |
| CC                         | 1.0111 | 0.930    | -0.0015 | 0.2579       | 0.1387        | 0.2639       |
| $\tau^2 = 1, \tau_b^2 = 2$ |        |          |         |              |               |              |
| NM                         | 0.5633 | 0.935    | 0.0016  | 0.1437       | 0.0425        | 0.1454       |
| MI                         | 0.5763 | 0.944    | 0.0016  | 0.1470       | 0.0434        | 0.1459       |
| ME                         | 0.5644 | 0.933    | 0.0016  | 0.1440       | 0.0428        | 0.1460       |
| SGR                        | 0.5656 | 0.935    | 0.0015  | 0.1443       | 0.0429        | 0.1460       |
| SLM                        | 0.5641 | 0.937    | 0.0016  | 0.1439       | 0.0426        | 0.1459       |
| CC                         | 0.7257 | 0.926    | 0.0014  | 0.1851       | 0.0715        | 0.1883       |
| $\tau^2 = 2, \tau_b^2 = 2$ |        |          |         |              |               |              |
| NM                         | 0.7845 | 0.935    | 0.0021  | 0.2001       | 0.0825        | 0.2025       |
| MI                         | 0.7962 | 0.942    | 0.0021  | 0.2031       | 0.0833        | 0.2028       |
| ME                         | 0.7840 | 0.932    | 0.0021  | 0.2000       | 0.0827        | 0.2028       |
| SGR                        | 0.7852 | 0.933    | 0.0021  | 0.2003       | 0.0828        | 0.2028       |
| SLM                        | 0.7853 | 0.935    | 0.0022  | 0.2003       | 0.0825        | 0.2028       |
| CC                         | 1.0105 | 0.924    | 0.0018  | 0.2578       | 0.1390        | 0.2624       |

Table 15: Confidence interval width, coverage probability, estimation bias, estimated standard error, estimated mean square error, and empirical standard error for mixed effects analysis, and 40% missingness in sample variances for  $\beta_1 = 0.75$ . NM is no missingness, MI is multiple imputation using gamma meta-regression, ME is mean imputation, SGR is single imputation using gamma meta-regression, SLM is single imputation using linear regression based on the log-variance, and CC is complete case analysis.

| $\beta_1 = 0.75$           | Width  | Coverage | Bias    | Estimated SE | Estimated MSE | Empirical SE |
|----------------------------|--------|----------|---------|--------------|---------------|--------------|
| $\tau^2 = 1, \tau_b^2 = 1$ |        |          |         |              |               |              |
| NM                         | 0.6060 | 0.938    | -0.0022 | 0.1546       | 0.0488        | 0.1559       |
| MI                         | 0.6277 | 0.944    | -0.0019 | 0.1601       | 0.0512        | 0.1584       |
| ME                         | 0.6097 | 0.933    | -0.0018 | 0.1555       | 0.0503        | 0.1597       |
| SGR                        | 0.6141 | 0.935    | -0.0018 | 0.1567       | 0.0503        | 0.1587       |
| SLM                        | 0.6088 | 0.935    | -0.0020 | 0.1553       | 0.0498        | 0.1586       |
| CC                         | 0.7671 | 0.929    | -0.0003 | 0.1957       | 0.0803        | 0.2015       |
| $\tau^2 = 2, \tau_b^2 = 1$ |        |          |         |              |               |              |
| NM                         | 0.8205 | 0.938    | -0.0032 | 0.2093       | 0.0896        | 0.2113       |
| MI                         | 0.8375 | 0.940    | -0.0029 | 0.2137       | 0.0920        | 0.2130       |
| ME                         | 0.8206 | 0.934    | -0.0028 | 0.2093       | 0.0906        | 0.2137       |
| SGR                        | 0.8260 | 0.934    | -0.0028 | 0.2107       | 0.0911        | 0.2133       |
| SLM                        | 0.8210 | 0.933    | -0.0029 | 0.2094       | 0.0904        | 0.2131       |
| CC                         | 1.0453 | 0.927    | -0.0007 | 0.2667       | 0.1493        | 0.2743       |
| $\tau^2 = 1, \tau_b^2 = 2$ |        |          |         |              |               |              |
| NM                         | 0.6136 | 0.937    | 0.0022  | 0.1565       | 0.0506        | 0.1590       |
| MI                         | 0.6629 | 0.949    | 0.0018  | 0.1691       | 0.0566        | 0.1653       |
| ME                         | 0.6248 | 0.925    | 0.0016  | 0.1594       | 0.0543        | 0.1672       |
| SGR                        | 0.6330 | 0.930    | 0.0014  | 0.1615       | 0.0545        | 0.1657       |
| SLM                        | 0.6204 | 0.927    | 0.0018  | 0.1583       | 0.0535        | 0.1663       |
| CC                         | 0.7756 | 0.924    | 0.0017  | 0.1979       | 0.0818        | 0.2016       |
| $\tau^2 = 2, \tau_b^2 = 2$ |        |          |         |              |               |              |
| NM                         | 0.8290 | 0.935    | 0.0028  | 0.2115       | 0.0924        | 0.2146       |
| MI                         | 0.8682 | 0.943    | 0.0025  | 0.2215       | 0.0982        | 0.2187       |
| ME                         | 0.8326 | 0.925    | 0.0023  | 0.2124       | 0.0954        | 0.2200       |
| SGR                        | 0.8435 | 0.931    | 0.0022  | 0.2152       | 0.0964        | 0.2195       |
| SLM                        | 0.8304 | 0.930    | 0.0025  | 0.2118       | 0.0947        | 0.2194       |
| CC                         | 1.0539 | 0.923    | 0.0023  | 0.2689       | 0.1513        | 0.2739       |



Table 16: Confidence interval width, coverage probability, estimation bias, estimated standard error, estimated mean square error, and empirical standard error for mixed effects analysis, and 40% missingness in sample variances for  $\beta_1 = 1.5$ . NM is no missingness, MI is multiple imputation using gamma meta-regression, ME is mean imputation, SGR is single imputation using gamma meta-regression, SLM is single imputation using linear regression based on the log-variance, and CC is complete case analysis.

| $\beta_1 = 1.5$            | Width  | Coverage | Bias    | Estimated SE | Estimated MSE | Empirical SE |
|----------------------------|--------|----------|---------|--------------|---------------|--------------|
| $\tau^2 = 1, \tau_b^2 = 1$ |        |          |         |              |               |              |
| NM                         | 0.7330 | 0.933    | -0.0017 | 0.1870       | 0.0725        | 0.1912       |
| MI                         | 0.8113 | 0.947    | -0.0015 | 0.2070       | 0.0850        | 0.2027       |
| ME                         | 0.8118 | 0.902    | 0.0002  | 0.2071       | 0.1037        | 0.2438       |
| SGR                        | 0.7598 | 0.931    | -0.0010 | 0.1938       | 0.0789        | 0.2007       |
| SLM                        | 0.7541 | 0.929    | -0.0014 | 0.1923       | 0.0786        | 0.2016       |
| CC                         | 0.8841 | 0.925    | 0.0005  | 0.2255       | 0.1088        | 0.2362       |
| $\tau^2 = 2, \tau_b^2 = 1$ |        |          |         |              |               |              |
| NM                         | 0.9447 | 0.932    | -0.0026 | 0.2410       | 0.1205        | 0.2462       |
| MI                         | 1.0083 | 0.942    | -0.0022 | 0.2572       | 0.1335        | 0.2563       |
| ME                         | 0.9948 | 0.904    | -0.0008 | 0.2538       | 0.1510        | 0.2907       |
| SGR                        | 0.9695 | 0.928    | -0.0016 | 0.2473       | 0.1283        | 0.2553       |
| SLM                        | 0.9578 | 0.926    | -0.0021 | 0.2442       | 0.1268        | 0.2557       |
| CC                         | 1.1546 | 0.923    | 0.0003  | 0.2946       | 0.1856        | 0.3077       |
| $\tau^2 = 1, \tau_b^2 = 2$ |        |          |         |              |               |              |
| NM                         | 0.7346 | 0.929    | 0.0029  | 0.1874       | 0.0738        | 0.1935       |
| MI                         | 0.9204 | 0.955    | 0.0014  | 0.2348       | 0.1093        | 0.2272       |
| ME                         | 0.8343 | 0.887    | 0.0008  | 0.2128       | 0.1208        | 0.2709       |
| SGR                        | 0.7868 | 0.923    | 0.0008  | 0.2007       | 0.0873        | 0.2130       |
| SLM                        | 0.7768 | 0.912    | 0.0011  | 0.1982       | 0.0906        | 0.2234       |
| CC                         | 0.7768 | 0.923    | 0.0022  | 0.2267       | 0.1093        | 0.2349       |
| $\tau^2 = 2, \tau_b^2 = 2$ |        |          |         |              |               |              |
| NM                         | 0.9520 | 0.928    | 0.0037  | 0.2429       | 0.1239        | 0.2499       |
| MI                         | 1.1041 | 0.946    | 0.0022  | 0.2817       | 0.1600        | 0.2787       |
| ME                         | 1.0244 | 0.887    | 0.0014  | 0.2613       | 0.1736        | 0.3200       |
| SGR                        | 1.0020 | 0.921    | 0.0014  | 0.2556       | 0.1406        | 0.2691       |
| SLM                        | 0.9784 | 0.909    | 0.0020  | 0.2496       | 0.1416        | 0.2772       |
| CC                         | 1.1650 | 0.920    | 0.0027  | 0.2972       | 0.1877        | 0.3067       |
